# Supplementary material for: Liver protects neuron viability and electrocortical activity in post-cardiac arrest brain injury
Source: PubMed Central journal article supplement (PMC11479250; doi:10.1038/s44321-024-00140-z), 2024-09-19
Supplement: 44321_2024_140_MOESM1_ESM.pdf [file 44321_2024_140_MOESM1_ESM.pdf]

**Appendix information for**  
***‘Liver protects neuron viability and electrocortical activity in post-cardiac arrest brain injury’***

**This PDF file includes:**

Appendix Figures S1 to 6

Appendix Tables S1 to 3

## Contents

|          |                |   |
|----------|----------------|---|
| Appendix | Figure S1..... | 1 |
| Appendix | Figure S2..... | 2 |
| Appendix | Figure S3..... | 4 |
| Appendix | Figure S4..... | 5 |
| Appendix | Figure S5..... | 6 |
| Appendix | Figure S6..... | 7 |
| Appendix | Table S1.....  | 8 |
| Appendix | Table S2.....  | 8 |
| Appendix | Table S3.....  | 9 |

1 **Appendix figures and figure legends**

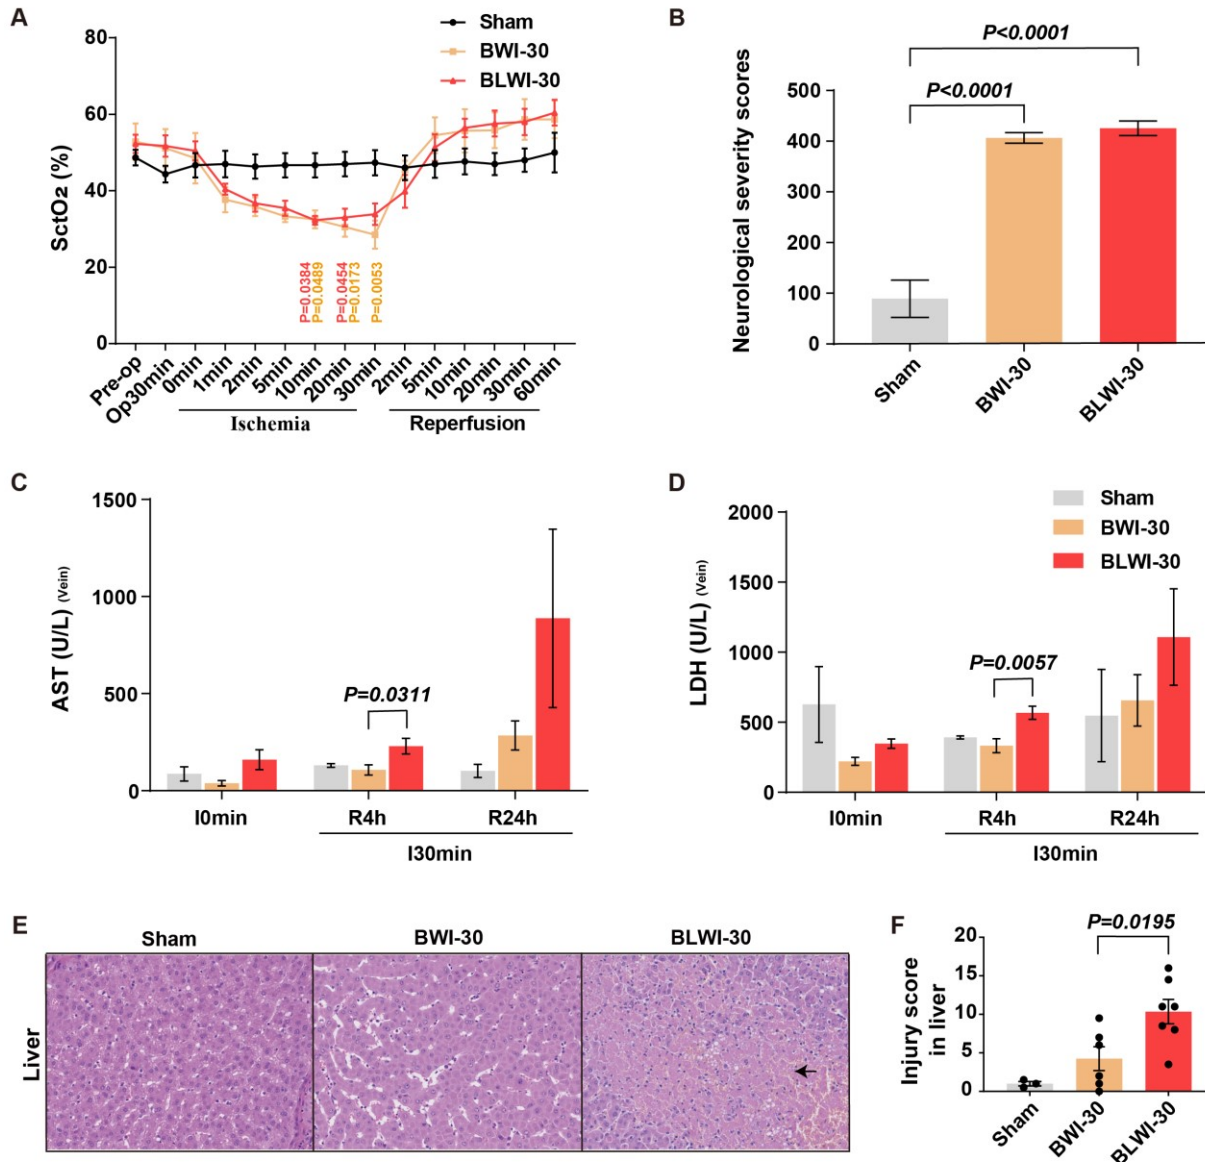

2 **Appendix Figure S1. Assessment of global cerebral ischemia *in vivo* using models with or**  
 3 **without liver ischemia.**

4 **(A)** Cerebral tissue oxygen saturation (SctO<sub>2</sub> (%)) of the *in vivo* model. Sham, no ischemia, *n*  
 5 = 3; BWI-30, brain with 30-minutes warm ischemia, *n* = 6; BLWI-30, brain and liver with 30-  
 6 minutes warm ischemia, *n* = 7; Op, operation; Mean ± SEM, 2-way ANOVA analysis; versus  
 7 Sham. **(B)** Neurological severity scores were assessed by two individuals at 6 hours after  
 8 reperfusion following 30 minutes of ischemia. Sham, *n* = 3; BWI-30, *n* = 6; BLWI-30, *n* = 5.  
 9 **(C, D)** Serum aminotransferase (AST) **(C)** and lactate dehydrogenase (LDH) **(D)** levels. I,  
 10 ischemia; R, reperfusion. **(E)** Haematoxylin and eosin staining of the liver. The arrowhead

11 pointed to the damaged tissue. (F) The injury scores for the mean of two fields in the liver. (B)  
 12 to (D), and (F), Mean  $\pm$  SEM, two-tailed ratio unpaired t-test. (C), (D), and (F), Sham,  $n = 3$ ;  
 13 BWI-30,  $n = 6$ ; BLWI-30,  $n = 7$ . All replicates shown were biological replicates.

14

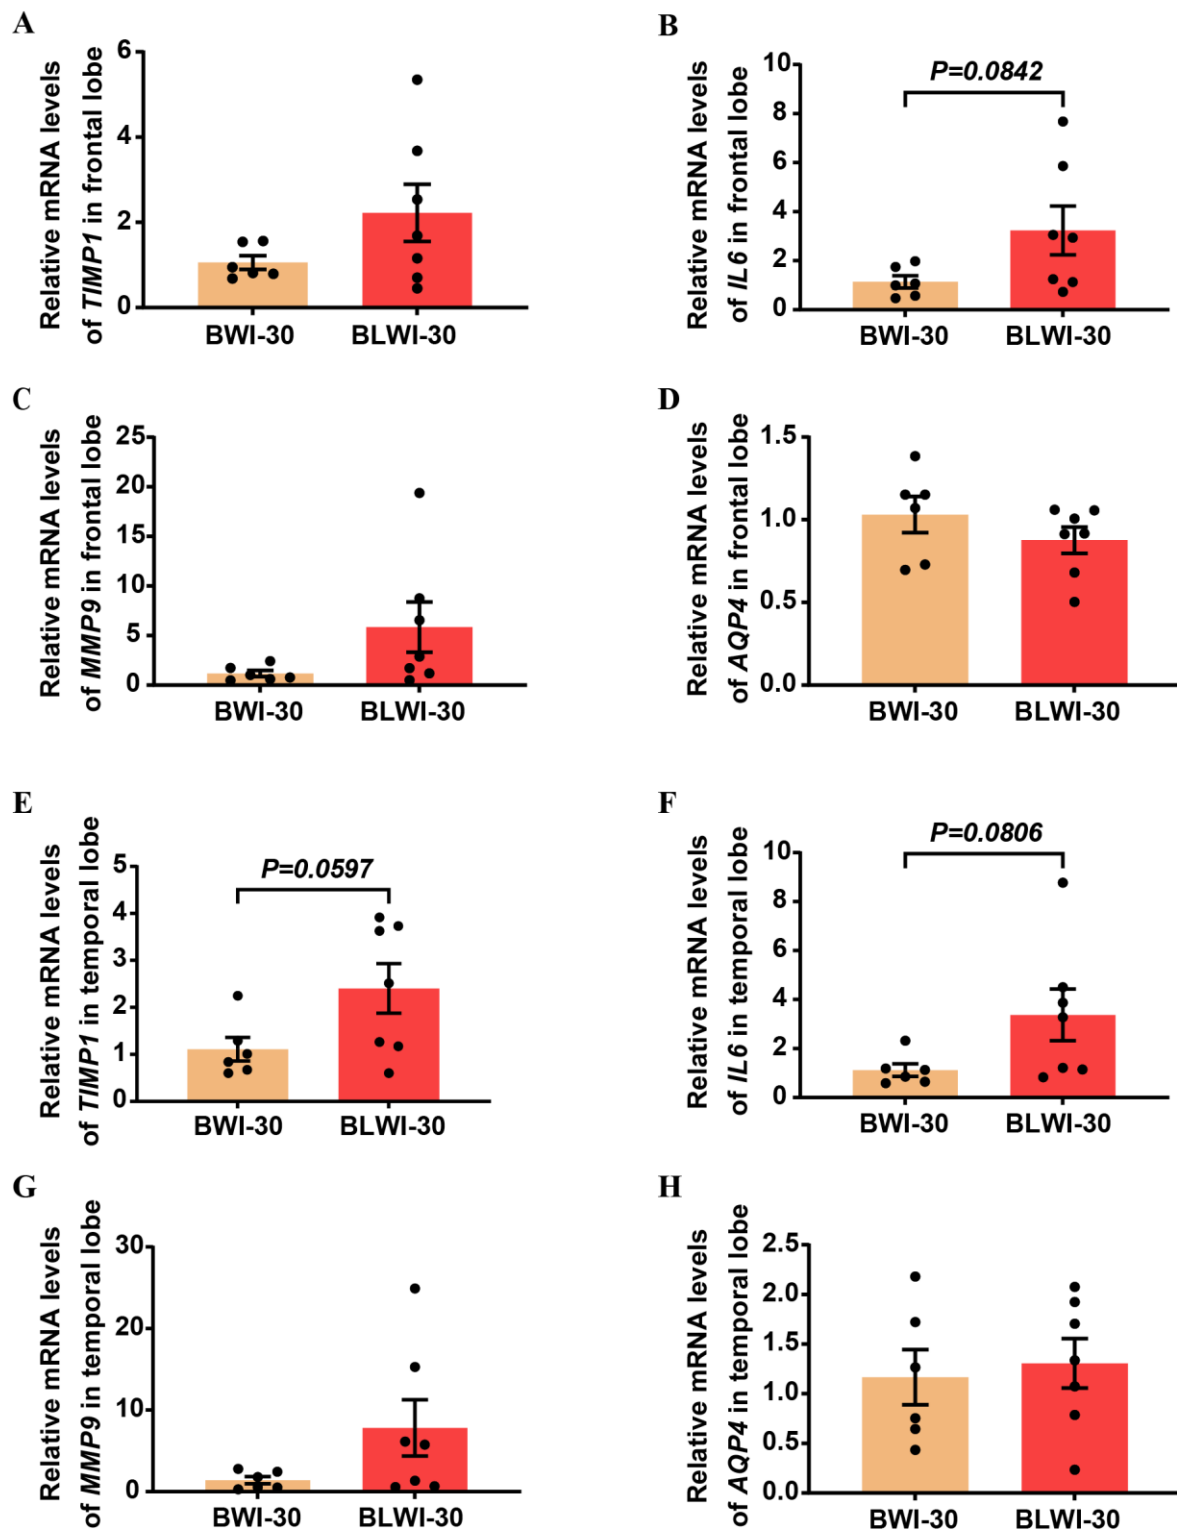

15 **Appendix Figure S2. Expression of genes related to blood-brain barrier (BBB) damage in**  
16 **the pig cerebral cortex.**

17 **(A-D)** Relative mRNA levels of *TIMP1*, *IL6*, *MMP9*, and *AQP4* in the frontal lobe. **(E-H)**  
18 Relative mRNA levels of *TIMP1*, *IL6*, *MMP9*, and *AQP4* in the temporal lobe. **(A-H)** Mean  $\pm$   
19 SEM, two-tailed ratio unpaired *t*-test; BWI-30, brain with 30-minutes warm ischemia, *n* = 6;  
20 BLWI-30, BLWI-30, brain and liver with 30-minutes warm ischemia, *n* = 7. All replicates  
21 shown were biological replicates.

22

23

24

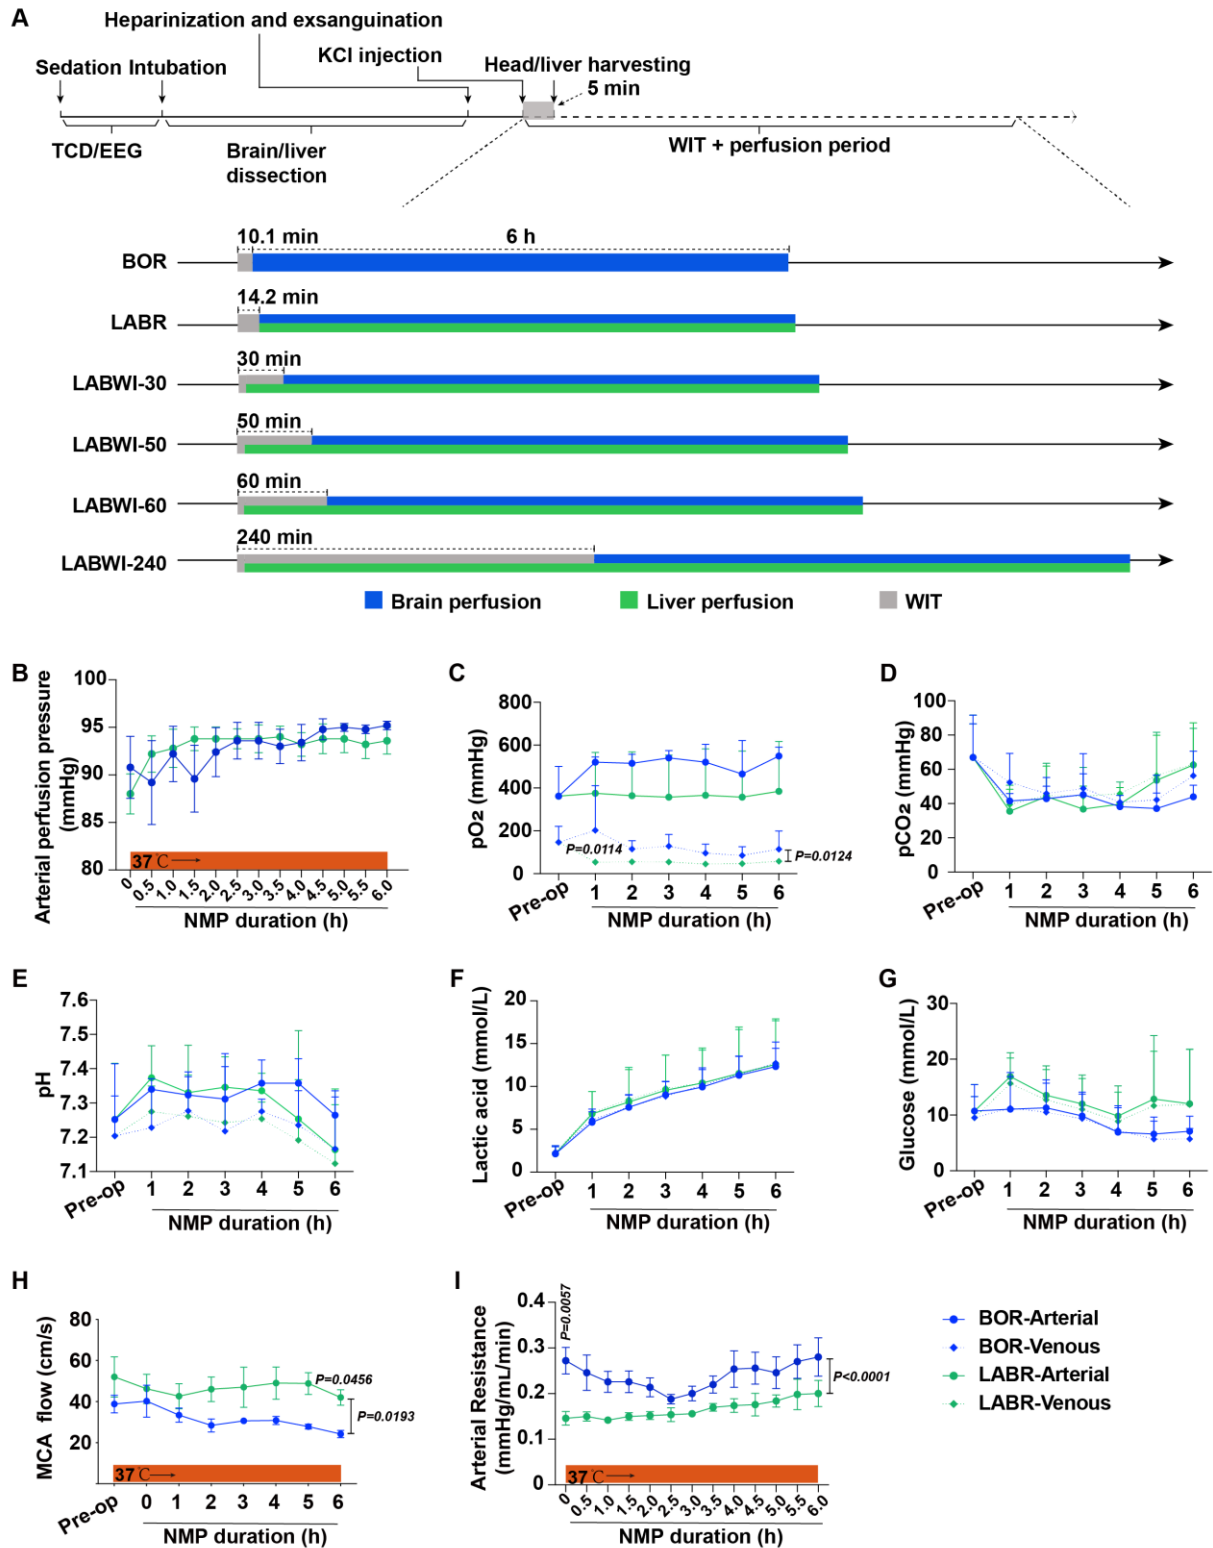

25 **Appendix Figure S3. *Ex vivo* NMP of pig brains can restore vascular circulation and**  
 26 **metabolic activity.**

27 **(A)** Schematic depicting the experimental workflow and conditions. WIT, warm ischemia time;

28 BOR, brain-only controls with rapid NMP; LABR, liver-assisted brains with rapid NMP;

29 LABWI-30/50/60/240, liver-assisted brain groups in which NMP was preceded by 30-240  
 30 minutes WIT; EEG, electroencephalography; TCD, transcranial Doppler. **(B)** Pressure in the  
 31 common carotid artery trunk. **(C-G)** Paired measurements of BOR and LABR in arterial or  
 32 venous samples indicating the arteriovenous gradients of pO<sub>2</sub> **(C)**, pCO<sub>2</sub> **(D)**, pH **(E)**, lactic acid  
 33 **(F)** and glucose **(G)** in the *ex vivo* brain NMP system. **(H)** The middle cerebral artery (MCA)  
 34 of the five brains during *ex vivo* NMP. **(I)** Vascular resistance of the common carotid artery  
 35 trunk. **(B) to (I)**, *n* = 5 biological replicates; Mean ± SEM, 2-way ANOVA analysis; BOR  
 36 versus LABR.

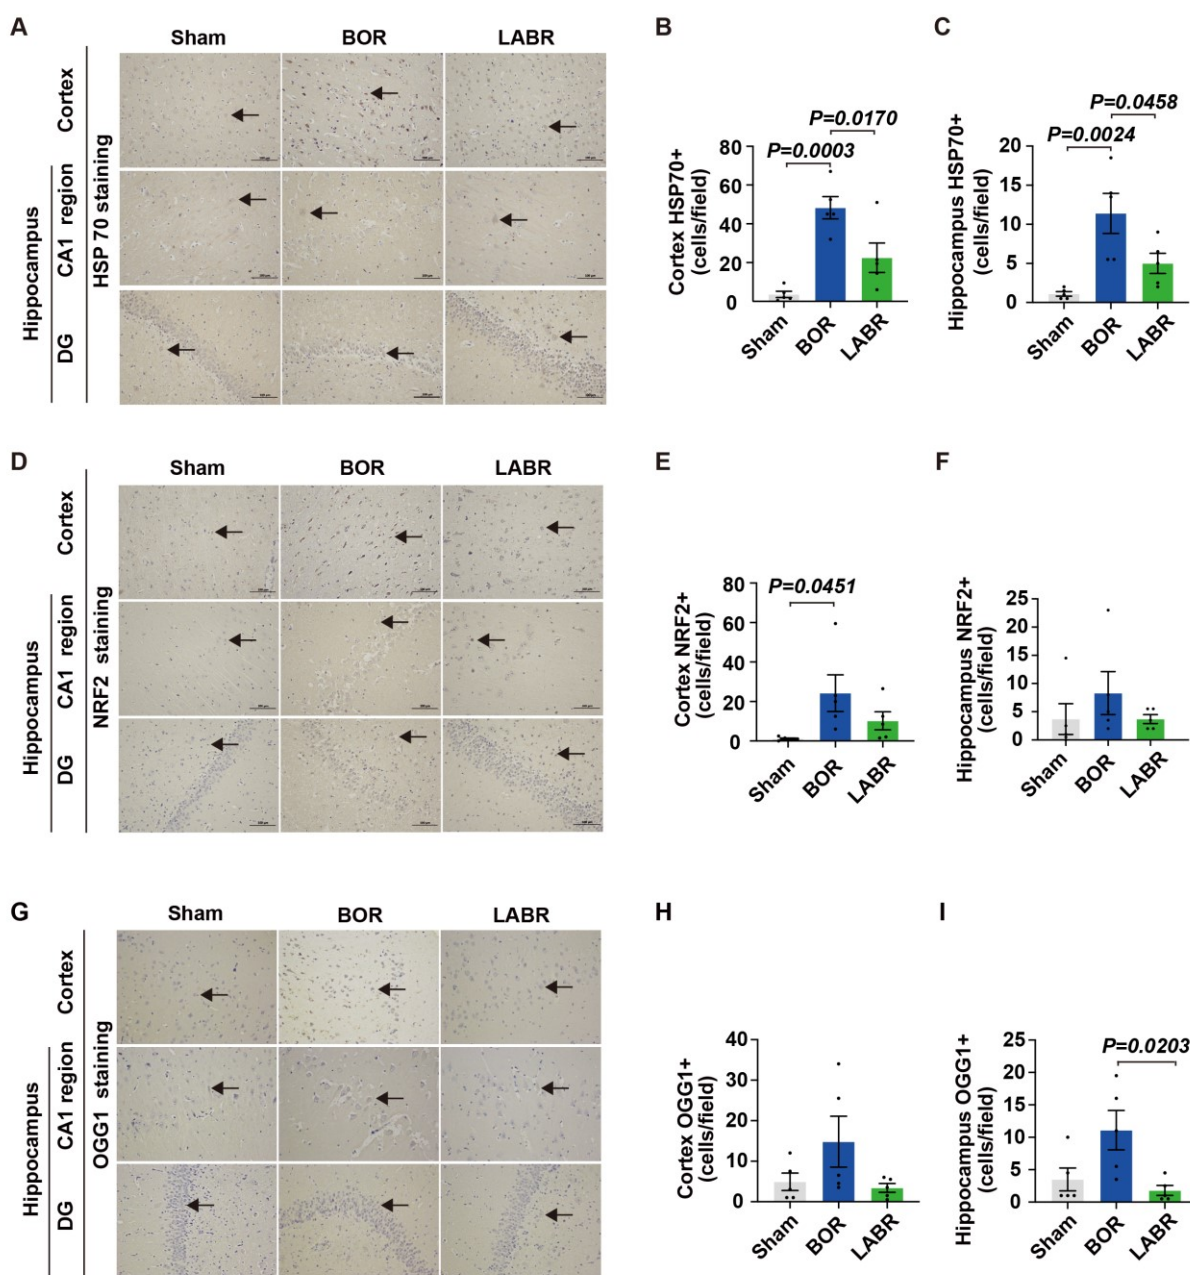

37

38 **Appendix Figure S4. Staining for hypoxia-induced markers in perfused pig brains.**

39 (A-C) Immunohistochemistry analysis of HSP70 indicated the degree of heat shock stimulation.  
40 The upregulation of HSP70 was shown as deep brown staining. The number of cells with  
41 upregulated expression of HSP70 in the cortex (B) and hippocampus (C). (D-F)  
42 Immunohistochemistry analysis of nuclear factor erythroid 2 like 2 (NRF2) demonstrates the  
43 degree of oxidative stress. NRF2 was shown as brown staining. The number of cells with  
44 upregulated expression of NRF2 in the cortex (E) and hippocampus (F). (G-I)  
45 Immunohistochemistry analysis of DNA repairing 8-oxoguanine DNA glycosylase (OGG)  
46 demonstrates the repair of oxidative damage. OGG1 was shown as brown staining. The number  
47 of cells showing upregulated expression of OGG1 in the cortex (H) and hippocampus (I). (A-  
48 I) Two fields (200×) of each brain were used for counting.  $n = 5$  biological replicates; Mean  $\pm$   
49 SEM, two-tailed ratio unpaired  $t$ -test; \* $P < 0.05$ , \*\* $P < 0.01$ , \*\*\* $P < 0.001$ .

50

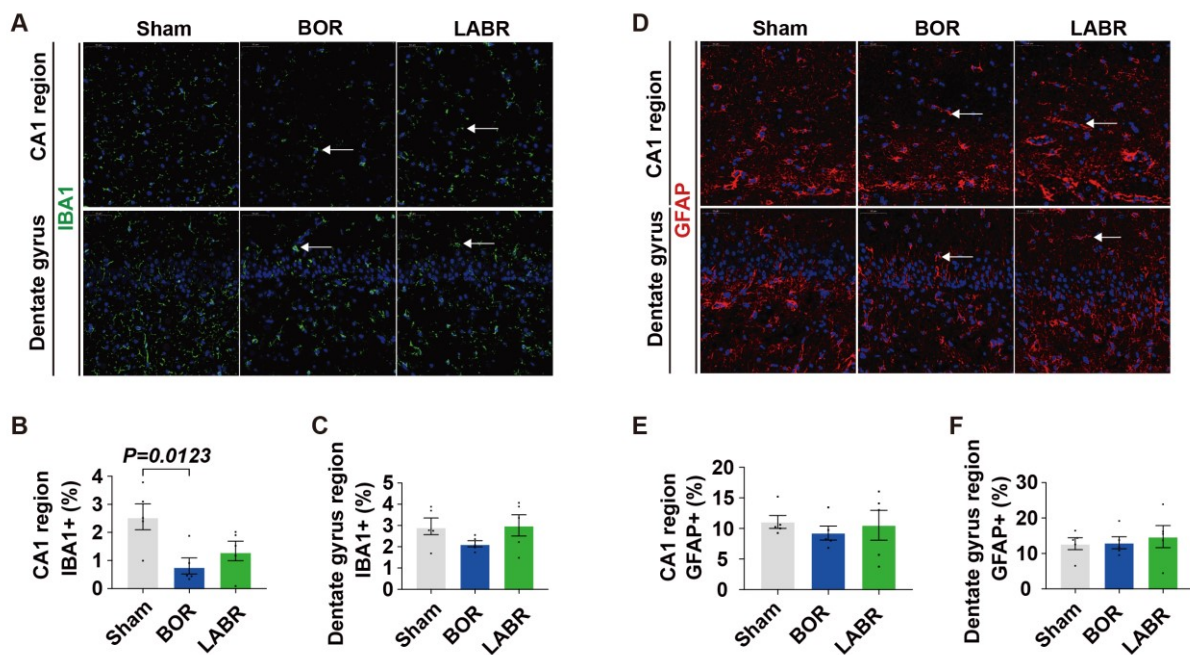

51

52 **Appendix Figure S5. Viability of microglia and astrocytes.**

53 (A-C) Immunofluorescence staining for IBA1 in the hippocampus of pigs. IBA1-positive cells  
54 were counted in the CA1 field (B) and dentate gyrus (C). (D-F) Immunofluorescence staining  
55 for GFAP in the hippocampus of pigs. The fluorescence area of GFAP was measured in the CA1



56 field (E) and dentate gyrus (F). Two fields of view (200× magnification) from each brain were  
 57 used for cell counting.  $n = 5$  biological replicates; Mean  $\pm$  SEM, two-tailed ratio unpaired  $t$ -test.  
 58

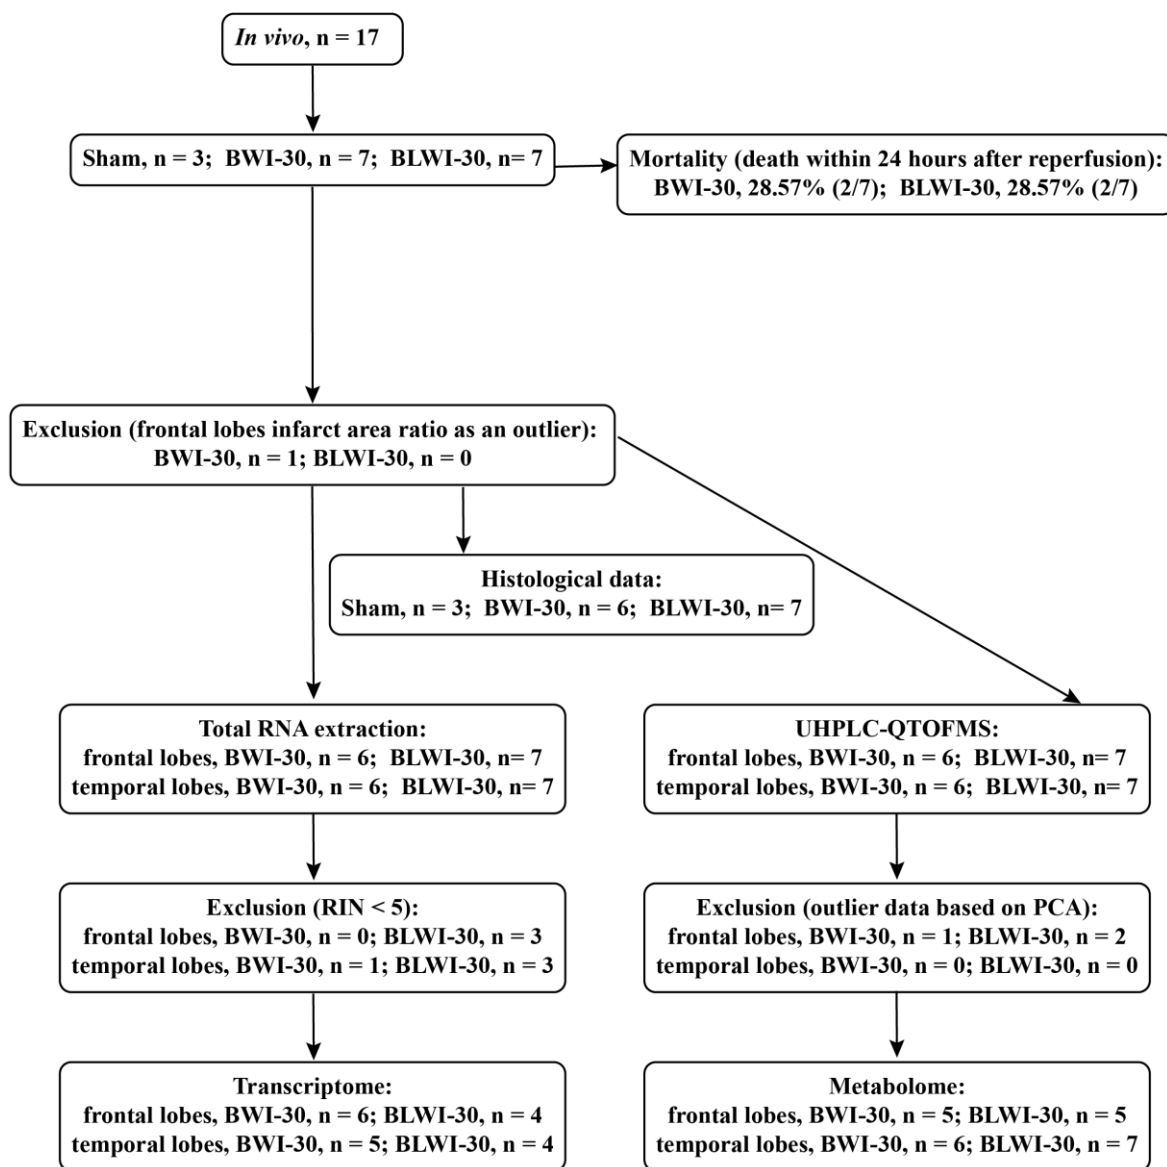

59  
 60 **Appendix Figure S6. The number of pigs and data exclusion for specific analyses.**  
 61 BWI-30, 30-min brain warm ischemia; BLWI-30, 30-min brain and liver warm ischemia; RIN,  
 62 RNA integrity number; UHPLC-QTOFMS, ultra-high-performance liquid chromatography  
 63 quadrupole time-of-flight mass spectrometry; PCA, principal component analysis.

64

65 **Appendix tables**

66 **Appendix Table S1.** Primer sequences of the genes.

| <b>Gene Name</b> | <b>Primer sequences</b> |                       |
|------------------|-------------------------|-----------------------|
| <i>Aqp4</i>      | Forward                 | CCGGCGGCCTTTATGAGTAT  |
| <i>Aqp4</i>      | Reverse                 | TTCTGTTGTCATCCGCCTCC  |
| <i>Gapdh</i>     | Forward                 | GTCGGAGTGAACGGATTTGGC |
| <i>Gapdh</i>     | Reverse                 | CTTGCCGTGGGTGGAATCAT  |
| <i>Il6</i>       | Forward                 | CTGCAGTCACAGAACGAGTG  |
| <i>Il6</i>       | Reverse                 | CGGCATCAATCTCAGGTGCC  |
| <i>Mmp9</i>      | Forward                 | ACTTCGGAAACGCAAAGGC   |
| <i>Mmp9</i>      | Reverse                 | AAGAGTCTCTCGCTAGGGCA  |
| <i>Timp1</i>     | Forward                 | TCACTGCTTGTGGACAGACC  |
| <i>Timp1</i>     | Reverse                 | GAACACTGTGCAGGTTTCGG  |

67

68 **Appendix Table S2.** Composition of the perfusate related to **Fig. 3A.**

| <b>Component</b>    | <b>Volume/dose</b> |
|---------------------|--------------------|
| Blood               | 800–1000 mL        |
| Gelofusine          | 500 mL             |
| Calcium chloride    | 1.5 g              |
| Magnesium sulphate  | 0.75 g             |
| 5% Bicarbonate      | 40–50 mL           |
| Compound amino acid | 200 mL             |
| Heparin             | 37500 U            |
| Metronidazole       | 0.5 g              |
| Methylprednisolone  | 500 mg             |
| Sulperazone         | 1.5 g              |

69

70

71

72

73 **Appendix Table S3.** Electroencephalogram (EEG) scores were assessed at Pre-operation (Pre-  
74 op) and at 0.5, 1, 2, 3, 4, 5 and 6 hours (h) after normothermic machine perfusion (NMP) for  
75 all pigs. The statistical analysis of EEGs is presented in **Fig. 4F and Fig. EV2**, while EEG  
76 scores are detailed in **Fig. 4G**. No brainwaves = 0 points;  $\delta$  wave = 1 point;  $\theta$  wave = 2 points;  
77  $\alpha$  wave = 3 points;  $\beta$  wave = 4 points.

| Group     | Pig   | NMP Duration     | Brain Wave       | EEG Score |
|-----------|-------|------------------|------------------|-----------|
| BOR group | Pig 1 | Pre-op           | $\alpha, \beta$  | 7         |
|           |       | 30 min           | $\alpha, \beta$  | 7         |
|           |       | 1 h              | $\alpha, \beta$  | 7         |
|           |       | 2 h              | $\theta, \alpha$ | 5         |
|           |       | 3 h              | $\alpha, \beta$  | 7         |
|           |       | 4 h              | $\delta, \theta$ | 3         |
|           |       | 5 h              | $\delta, \theta$ | 3         |
|           |       | 6 h              | $\delta$         | 1         |
|           | Pig 2 | Pre-op           | $\alpha, \beta$  | 7         |
|           |       | 30 min           | $\alpha, \beta$  | 7         |
|           |       | 1 h              | $\alpha, \beta$  | 7         |
|           |       | 2 h              | $\theta, \alpha$ | 5         |
|           |       | 3 h              | $\alpha, \beta$  | 7         |
|           |       | 4 h              | $\delta, \theta$ | 3         |
|           |       | 5 h              | $\theta$         | 2         |
|           |       | 6 h              | $\delta$         | 1         |
|           | Pig 3 | Pre-op           | $\alpha, \beta$  | 7         |
|           |       | 30 min           | $\alpha, \beta$  | 7         |
|           |       | 1 h              | $\delta, \theta$ | 3         |
|           |       | 2 h              | $\delta, \theta$ | 3         |
|           |       | 3 h              | $\alpha, \beta$  | 7         |
| 4 h       |       | $\alpha, \beta$  | 7                |           |
|           | 5 h   | $\theta, \alpha$ | 5                |           |

|            |       |        |                  |   |
|------------|-------|--------|------------------|---|
|            |       | 6 h    | $\delta$         | 1 |
|            | Pig 4 | Pre-op | $\alpha, \beta$  | 7 |
|            |       | 30 min | $\alpha, \beta$  | 7 |
|            |       | 1 h    | $\alpha, \beta$  | 7 |
|            |       | 2 h    | $\theta, \alpha$ | 5 |
|            |       | 3 h    | $\theta$         | 2 |
|            |       | 4 h    | $\delta, \theta$ | 3 |
|            |       | 5 h    | $\delta$         | 1 |
|            |       | 6 h    | $\delta$         | 1 |
|            | Pig 5 | Pre-op | $\alpha, \beta$  | 7 |
|            |       | 30 min | $\alpha, \beta$  | 7 |
|            |       | 1 h    | $\alpha, \beta$  | 7 |
|            |       | 2 h    | $\theta, \alpha$ | 5 |
|            |       | 3 h    | $\alpha, \beta$  | 7 |
|            |       | 4 h    | $\alpha, \beta$  | 7 |
|            |       | 5 h    | $\theta, \alpha$ | 5 |
|            |       | 6 h    | $\theta, \alpha$ | 5 |
| LABR group | Pig 1 | Pre-op | $\alpha, \beta$  | 7 |
|            |       | 30 min | $\delta, \theta$ | 3 |
|            |       | 1 h    | $\theta, \alpha$ | 5 |
|            |       | 2 h    | $\theta, \alpha$ | 5 |
|            |       | 3 h    | $\theta, \alpha$ | 5 |
|            |       | 4 h    | $\alpha, \beta$  | 7 |
|            |       | 5 h    | $\alpha, \beta$  | 7 |
|            |       | 6 h    | $\alpha, \beta$  | 7 |
|            | Pig 2 | Pre-op | $\alpha, \beta$  | 7 |
|            |       | 30 min | $\theta, \alpha$ | 5 |
|            |       | 1 h    | $\alpha, \beta$  | 7 |
|            |       | 2 h    | $\theta, \alpha$ | 5 |

|          |       |        |                  |   |
|----------|-------|--------|------------------|---|
|          |       | 3 h    | $\theta, \alpha$ | 5 |
|          |       | 4 h    | $\theta, \alpha$ | 5 |
|          |       | 5 h    | $\alpha, \beta$  | 7 |
|          |       | 6 h    | $\alpha, \beta$  | 7 |
| Pig 3    |       | Pre-op | $\alpha, \beta$  | 7 |
|          |       | 30 min | $\delta, \theta$ | 3 |
|          |       | 1 h    | $\alpha, \beta$  | 7 |
|          |       | 2 h    | $\alpha, \beta$  | 7 |
|          |       | 3 h    | $\theta, \alpha$ | 5 |
|          |       | 4 h    | $\theta, \alpha$ | 5 |
|          |       | 5 h    | $\alpha, \beta$  | 7 |
|          |       | 6 h    | $\alpha, \beta$  | 7 |
| Pig 4    |       | Pre-op | $\alpha, \beta$  | 7 |
|          |       | 30 min | $\delta, \theta$ | 3 |
|          |       | 1 h    | $\alpha, \beta$  | 7 |
|          |       | 2 h    | $\theta, \alpha$ | 5 |
|          |       | 3 h    | $\alpha, \beta$  | 7 |
|          |       | 4 h    | $\alpha, \beta$  | 7 |
|          |       | 5 h    | $\theta, \alpha$ | 5 |
|          |       | 6 h    | $\theta, \alpha$ | 5 |
| Pig 5    |       | Pre-op | $\theta, \alpha$ | 5 |
|          |       | 30 min | $\delta, \theta$ | 3 |
|          |       | 1 h    | $\alpha, \beta$  | 7 |
|          |       | 2 h    | $\alpha, \beta$  | 7 |
|          |       | 3 h    | $\alpha, \beta$  | 7 |
|          |       | 4 h    | $\alpha, \beta$  | 7 |
|          |       | 5 h    | $\alpha, \beta$  | 7 |
|          |       | 6 h    | $\alpha, \beta$  | 7 |
| LABWI-30 | Pig 1 | Pre-op | $\alpha, \beta$  | 7 |

|       |        |                  |   |
|-------|--------|------------------|---|
| group | 30 min | $\theta, \alpha$ | 5 |
|       | 1 h    | $\theta, \alpha$ | 5 |
|       | 2 h    | $\alpha, \beta$  | 7 |
|       | 3 h    | $\alpha, \beta$  | 7 |
|       | 4 h    | $\alpha, \beta$  | 7 |
|       | 5 h    | $\theta, \alpha$ | 5 |
|       | 6 h    | $\alpha, \beta$  | 7 |
| Pig 2 | Pre-op | $\theta, \alpha$ | 5 |
|       | 30 min | $\theta, \alpha$ | 5 |
|       | 1 h    | $\theta, \alpha$ | 5 |
|       | 2 h    | $\delta, \theta$ | 3 |
|       | 3 h    | $\theta, \alpha$ | 5 |
|       | 4 h    | $\theta, \alpha$ | 5 |
|       | 5 h    | $\alpha, \beta$  | 7 |
|       | 6 h    | $\alpha, \beta$  | 7 |
| Pig 3 | Pre-op | $\alpha, \beta$  | 7 |
|       | 30 min | $\alpha, \beta$  | 7 |
|       | 1 h    | $\theta, \alpha$ | 5 |
|       | 2 h    | $\theta, \alpha$ | 5 |
|       | 3 h    | $\alpha, \beta$  | 7 |
|       | 4 h    | $\delta, \theta$ | 3 |
|       | 5 h    | $\theta, \alpha$ | 5 |
|       | 6 h    | $\alpha, \beta$  | 7 |
| Pig 4 | Pre-op | $\alpha, \beta$  | 7 |
|       | 30 min | $\delta, \theta$ | 3 |
|       | 1 h    | $\theta, \alpha$ | 5 |
|       | 2 h    | $\delta, \theta$ | 3 |
|       | 3 h    | $\delta, \theta$ | 3 |
|       | 4 h    | $\theta, \alpha$ | 5 |

|          |       |        |                  |   |
|----------|-------|--------|------------------|---|
|          |       | 5 h    | $\theta, \alpha$ | 5 |
|          |       | 6 h    | $\delta, \theta$ | 3 |
|          | Pig 5 | Pre-op | $\theta, \alpha$ | 5 |
|          |       | 30 min | $\delta, \theta$ | 3 |
|          |       | 1 h    | $\delta, \theta$ | 3 |
|          |       | 2 h    | $\theta, \alpha$ | 5 |
|          |       | 3 h    | $\alpha, \beta$  | 7 |
|          |       | 4 h    | $\alpha, \beta$  | 7 |
|          |       | 5 h    | $\alpha, \beta$  | 7 |
|          |       | 6 h    | $\alpha, \beta$  | 7 |
| LABWI-50 | Pig 1 | Pre-op | $\alpha, \beta$  | 7 |
| group    |       | 30 min | $\theta, \alpha$ | 5 |
|          |       | 1 h    | $\theta, \alpha$ | 5 |
|          |       | 2 h    | $\alpha, \beta$  | 7 |
|          |       | 3 h    | $\alpha, \beta$  | 7 |
|          |       | 4 h    | $\alpha, \beta$  | 7 |
|          |       | 5 h    | $\alpha, \beta$  | 7 |
|          |       | 6 h    | $\alpha, \beta$  | 7 |
|          | Pig 2 | Pre-op | $\theta, \alpha$ | 5 |
|          |       | 30 min | $\delta, \theta$ | 3 |
|          |       | 1 h    | $\delta, \theta$ | 3 |
|          |       | 2 h    | $\alpha, \beta$  | 7 |
|          |       | 3 h    | $\alpha, \beta$  | 7 |
|          |       | 4 h    | $\theta, \alpha$ | 5 |
|          |       | 5 h    | $\theta, \alpha$ | 5 |
|          |       | 6 h    | $\alpha, \beta$  | 7 |
|          | Pig 3 | Pre-op | $\alpha, \beta$  | 7 |
|          |       | 30 min | $\delta, \theta$ | 3 |
|          |       | 1 h    | $\delta, \theta$ | 3 |

|          |       |        |                  |   |
|----------|-------|--------|------------------|---|
|          |       | 2 h    | $\delta, \theta$ | 3 |
|          |       | 3 h    | $\delta, \theta$ | 3 |
|          |       | 4 h    | $\delta, \theta$ | 3 |
|          |       | 5 h    | $\theta, \alpha$ | 5 |
|          |       | 6 h    | $\theta, \alpha$ | 5 |
|          | Pig 4 | Pre-op | $\theta, \alpha$ | 5 |
|          |       | 30 min | $\theta, \alpha$ | 5 |
|          |       | 1 h    | $\theta, \alpha$ | 5 |
|          |       | 2 h    | $\delta, \theta$ | 3 |
|          |       | 3 h    | $\theta, \alpha$ | 5 |
|          |       | 4 h    | $\theta, \alpha$ | 5 |
|          |       | 5 h    | $\theta, \alpha$ | 5 |
|          |       | 6 h    | $\theta, \alpha$ | 5 |
|          | Pig 5 | Pre-op | $\theta, \alpha$ | 5 |
|          |       | 30 min | $\delta, \theta$ | 3 |
|          |       | 1 h    | $\delta, \theta$ | 3 |
|          |       | 2 h    | $\theta, \alpha$ | 5 |
|          |       | 3 h    | $\alpha, \beta$  | 7 |
|          |       | 4 h    | $\theta, \alpha$ | 5 |
|          |       | 5 h    | $\theta, \alpha$ | 5 |
|          |       | 6 h    | $\alpha, \beta$  | 7 |
| LABWI-60 | Pig 1 | Pre-op | $\alpha, \beta$  | 7 |
| group    |       | 30 min | no               | 0 |
|          |       | 1 h    | $\delta, \theta$ | 3 |
|          |       | 2 h    | $\delta, \theta$ | 3 |
|          |       | 3 h    | $\delta, \theta$ | 3 |
|          |       | 4 h    | $\theta, \alpha$ | 5 |
|          |       | 5 h    | $\delta, \theta$ | 3 |
|          |       | 6 h    | $\delta$         | 1 |



|                 |        |                  |                 |   |
|-----------------|--------|------------------|-----------------|---|
| Fig 2           | Pre-op | $\alpha, \beta$  | 7               |   |
|                 | 30 min | no               | 0               |   |
|                 | 1 h    | $\delta, \theta$ | 3               |   |
|                 | 2 h    | $\delta, \theta$ | 3               |   |
|                 | 3 h    | $\theta, \alpha$ | 5               |   |
|                 | 4 h    | $\theta, \alpha$ | 5               |   |
|                 | 5 h    | $\delta, \theta$ | 3               |   |
|                 | 6 h    | $\delta, \theta$ | 3               |   |
| Fig 3           | Pre-op | $\theta, \alpha$ | 5               |   |
|                 | 30 min | no               | 0               |   |
|                 | 1 h    | $\delta, \theta$ | 3               |   |
|                 | 2 h    | $\delta, \theta$ | 3               |   |
|                 | 3 h    | $\theta, \alpha$ | 5               |   |
|                 | 4 h    | $\delta, \theta$ | 3               |   |
|                 | 5 h    | $\delta, \theta$ | 3               |   |
|                 | 6 h    | $\delta, \theta$ | 3               |   |
| Fig 4           | Pre-op | $\alpha, \beta$  | 7               |   |
|                 | 30 min | no               | 0               |   |
|                 | 1 h    | $\delta, \theta$ | 3               |   |
|                 | 2 h    | $\delta, \theta$ | 3               |   |
|                 | 3 h    | $\theta, \alpha$ | 5               |   |
|                 | 4 h    | $\delta, \theta$ | 3               |   |
|                 | 5 h    | $\delta, \theta$ | 3               |   |
|                 | 6 h    | $\delta$         | 1               |   |
| LABWI-240 group | Fig 1  | Pre-op           | $\alpha, \beta$ | 7 |
|                 |        | 30 min           | no              | 0 |
|                 |        | 1 h              | no              | 0 |
|                 |        | 2 h              | no              | 0 |
|                 |        | 3 h              | no              | 0 |

|       |        |                  |   |
|-------|--------|------------------|---|
|       | 4 h    | no               | 0 |
|       | 5 h    | no               | 0 |
|       | 6 h    | no               | 0 |
| Pig 2 | Pre-op | $\alpha, \beta$  | 7 |
|       | 30 min | no               | 0 |
|       | 1 h    | $\delta, \theta$ | 3 |
|       | 2 h    | $\delta, \theta$ | 3 |
|       | 3 h    | $\delta, \theta$ | 3 |
|       | 4 h    | $\delta$         | 1 |
|       | 5 h    | $\delta, \theta$ | 3 |
|       | 6 h    | $\delta$         | 1 |
| Pig 3 | Pre-op | $\alpha, \beta$  | 7 |
|       | 30 min | no               | 0 |
|       | 1 h    | $\delta$         | 1 |
|       | 2 h    | $\delta, \theta$ | 3 |
|       | 3 h    | $\delta, \theta$ | 3 |
|       | 4 h    | $\delta, \theta$ | 3 |
|       | 5 h    | $\delta$         | 1 |
|       | 6 h    | no               | 0 |

---
